# Supplementary material
Source: PubMed Central journal article supplement (PMC11028823)
Supplement: 262_2016_1953_MOESM1_ESM.pdf [file 262_2016_1953_MOESM1_ESM.pdf]

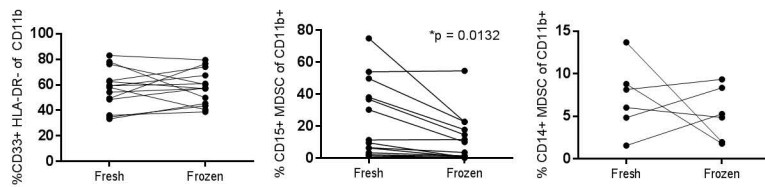

Supplemental Figure 1. Cryopreservation reduces the frequency of granulocytic MDSCs. The cryosensitivity of splenic MDSCs was determined by comparing the frequency of MDSCs in fresh and cryopreserved samples (frozen in human serum containing 10% DMSO and stored in liquid nitrogen) using a paired t test comparing total MDSCs (left), granulocytic MDSCs (middle), and monocytic MDSCs (right).

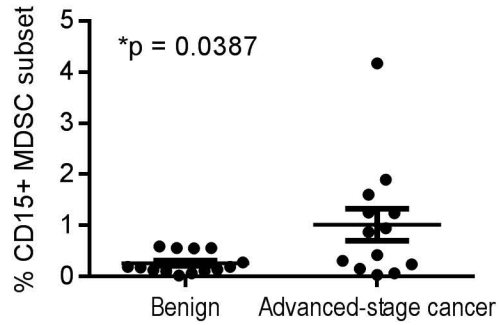

Supplemental Figure 2. Granulocytic MDSCs are increased in the spleens of patients with advanced-stage cancer. Human splenocytes were stained as in Figure 1 and the frequency of MDSCs was compared between patients with advanced-stage cancer (Stage III/IV) and those with benign pancreatic lesions using Student's *t* test.

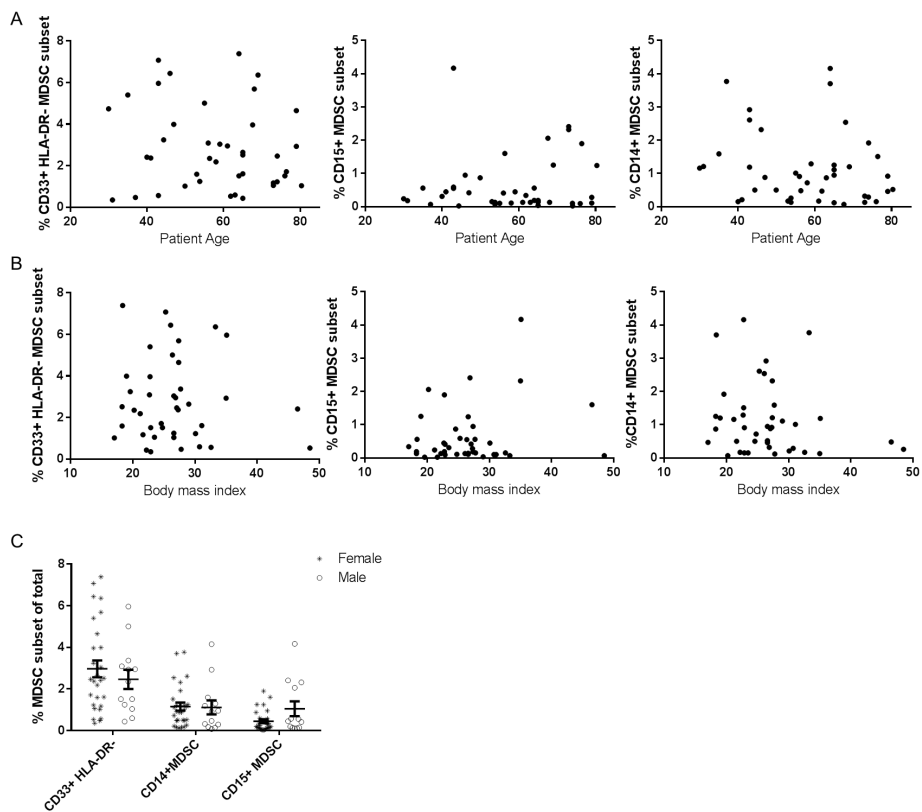

Supplemental Figure 3. The frequency of MDSCs in human spleen tissue does not correlate with age or body mass index and is similar between genders. The frequency of MDSCs was plotted versus patient's age (A) or BMI (B) and compared using a Pearson correlation test. No significant correlations were found. C. The frequency of MDSCs was compared in male and female patients using two-way ANOVA.
